# Supplementary material
Source: publisher site journal article supplement (https://www.dovepress.com/article/370964)
Supplement: Supplementary file 1 [file get_supplementary_file.php]

**Table S1**. Supplementary methods.

|  | detailed description of CMT(Conventional Microbiological test) |
| --- | --- |
| detailed description of CMT (Conventional Microbiological test) | (I) Direct examination for fungal diagnosis、direct sputum smear |
| (II) Blood culture |
| (III) Bacterial and fungal stains and cultures |
| (IV) AFB stains and cultures |
| (V) Xpert MTB/RIF |
| (VI) Serological tests for Epstein-Barr virus (EBV), cytomegalovirus (CMV) and influenza A/B |
| (VII) CMV and EBV DNA test |
| (VIII) Serum (1,3)-β-D-glucan test (G test) |
| (IX) Serum galactomannan test (GM test) |
| (X) T-SPOT TB test |
| (XI) Latex agglutination test |
| (XII) India ink method for Cryptococcus neoformans |
| Criteria of Infection | The diagnosis of different infection types was made by clinicians, and retrospective review of each infection medical records including clinical, microbiological and treatment results information were collected to determine whether they meet the definition of different types of infection according to the following microbiological and/or clinical criteria:  1) Centers for Disease Control and Prevention. (2019). CDC/NHSN Surveillance Definitions for Specific Types of Infections. Surveillance Definitions, (17), 1–29  2) Chen haozhu, Lin guowei, et al. Practice of Internal Medicine: 15th Edition. People’s Medical Publishing House Co., LTD., China, 2017 |

**Table S2**. Supplementary result of ARGs detected in 17 samples.

| sample | sample_type | ARG_name |
| --- | --- | --- |
| S62 | BALF | adeF_[Acinetobacter baumannii AYE] |
|  |  | adeC_[Acinetobacter baumannii] |
|  |  | adeH_[Acinetobacter baumannii AYE] |
|  |  | msrE_[Escherichia coli] |
|  |  | adeK_[Acinetobacter baumannii] |
|  |  | adeA_[Acinetobacter baumannii] |
|  |  | adeI_[Acinetobacter baumannii AB0057] |
|  |  | abeM_[Acinetobacter baumannii] |
|  |  | adeG_[Acinetobacter baumannii AYE] |
|  |  | adeL_[Acinetobacter baumannii] |
|  |  | adeS_[Acinetobacter baumannii] |
|  |  | armA_[Pseudomonas aeruginosa] |
|  |  | sul2_[Vibrio cholerae] |
|  |  | mphD_[Pseudomonas aeruginosa] |
|  |  | APH(3'')-Ib_[Pseudomonas aeruginosa] |
|  |  | APH(6)-Id_[Pseudomonas aeruginosa] |
|  |  | adeN_[Acinetobacter baumannii] |
|  |  | ANT(3'')-IIa_[Acinetobacter baumannii ATCC 19606] |
|  |  | abeS_[Acinetobacter baumannii AB307-0294] |
|  |  | tet(B)_[Gram-negative bacterium TC71] |
|  |  | APH(3')-IIIa_[Campylobacter coli CVM N29710] |
| S63 | BALF | adeF_[Acinetobacter baumannii AYE] |
|  |  | sul2_[Vibrio cholerae] |
|  |  | adeK_[Acinetobacter baumannii] |
|  |  | abeM_[Acinetobacter baumannii] |
|  |  | msrE_[Escherichia coli] |
|  |  | adeI_[Acinetobacter baumannii AB0057] |
|  |  | adeH_[Acinetobacter baumannii AYE] |
|  |  | adeC_[Acinetobacter baumannii] |
|  |  | adeL_[Acinetobacter baumannii] |
|  |  | adeG_[Acinetobacter baumannii AYE] |
|  |  | adeA_[Acinetobacter baumannii] |
|  |  | APH(3'')-Ib_[Pseudomonas aeruginosa] |
|  |  | APH(6)-Id_[Pseudomonas aeruginosa] |
|  |  | mphD_[Pseudomonas aeruginosa] |
|  |  | armA_[Pseudomonas aeruginosa] |
|  |  | ANT(3'')-IIa_[Acinetobacter baumannii ATCC 19606] |
|  |  | adeS_[Acinetobacter baumannii] |
|  |  | adeN_[Acinetobacter baumannii] |
|  |  | abeS_[Acinetobacter baumannii AB307-0294] |
| S64 | BALF | msrE_[Escherichia coli] |
|  |  | tet(39)_[Acinetobacter sp. LUH5605] |
|  |  | mphD_[Pseudomonas aeruginosa] |
|  |  | sul2_[Vibrio cholerae] |
|  |  | APH(3'')-Ib_[Pseudomonas aeruginosa] |
|  |  | APH(6)-Id_[Pseudomonas aeruginosa] |
| S134 | Bile | APH(3')-IIIa_[Campylobacter coli CVM N29710] |
|  |  | sul2_[Vibrio cholerae] |
|  |  | adeF_[Acinetobacter baumannii AYE] |
|  |  | abeM_[Acinetobacter baumannii] |
|  |  | adeK_[Acinetobacter baumannii] |
|  |  | adeI_[Acinetobacter baumannii AB0057] |
|  |  | msrE_[Escherichia coli] |
|  |  | adeH_[Acinetobacter baumannii AYE] |
|  |  | adeC_[Acinetobacter baumannii] |
|  |  | adeA_[Acinetobacter baumannii] |
|  |  | adeG_[Acinetobacter baumannii AYE] |
|  |  | adeL_[Acinetobacter baumannii] |
|  |  | APH(6)-Id_[Pseudomonas aeruginosa] |
|  |  | APH(3'')-Ib_[Pseudomonas aeruginosa] |
|  |  | mphD_[Pseudomonas aeruginosa] |
|  |  | ANT(3'')-IIa_[Acinetobacter baumannii ATCC 19606] |
|  |  | adeS_[Acinetobacter baumannii] |
|  |  | armA_[Pseudomonas aeruginosa] |
|  |  | adeN_[Acinetobacter baumannii] |
|  |  | abeS_[Acinetobacter baumannii AB307-0294] |
| S66 | BALF | adeF_[Acinetobacter baumannii AYE] |
|  |  | abeM_[Acinetobacter baumannii] |
|  |  | adeK_[Acinetobacter baumannii] |
|  |  | msrE_[Escherichia coli] |
|  |  | adeI_[Acinetobacter baumannii AB0057] |
|  |  | adeH_[Acinetobacter baumannii AYE] |
|  |  | sul2_[Vibrio cholerae] |
|  |  | adeC_[Acinetobacter baumannii] |
|  |  | adeL_[Acinetobacter baumannii] |
|  |  | adeG_[Acinetobacter baumannii AYE] |
|  |  | APH(3'')-Ib_[Pseudomonas aeruginosa] |
|  |  | adeA_[Acinetobacter baumannii] |
|  |  | mphD_[Pseudomonas aeruginosa] |
|  |  | APH(6)-Id_[Pseudomonas aeruginosa] |
|  |  | armA_[Pseudomonas aeruginosa] |
|  |  | adeS_[Acinetobacter baumannii] |
|  |  | ANT(3'')-IIa_[Acinetobacter baumannii ATCC 19606] |
|  |  | adeN_[Acinetobacter baumannii] |
|  |  | mel_[Streptococcus pneumoniae Taiwan19F-14] |
|  |  | abeS_[Acinetobacter baumannii AB307-0294] |
| S2 | BALF | adeF_[Acinetobacter baumannii AYE] |
|  |  | abeM_[Acinetobacter baumannii] |
|  |  | adeC_[Acinetobacter baumannii] |
|  |  | adeH_[Acinetobacter baumannii AYE] |
|  |  | adeK_[Acinetobacter baumannii] |
|  |  | msrE_[Escherichia coli] |
|  |  | adeI_[Acinetobacter baumannii AB0057] |
|  |  | adeA_[Acinetobacter baumannii] |
|  |  | sul2_[Vibrio cholerae] |
|  |  | adeG_[Acinetobacter baumannii AYE] |
|  |  | adeS_[Acinetobacter baumannii] |
|  |  | adeL_[Acinetobacter baumannii] |
|  |  | mphD_[Pseudomonas aeruginosa] |
|  |  | APH(3'')-Ib_[Pseudomonas aeruginosa] |
|  |  | APH(6)-Id_[Pseudomonas aeruginosa] |
|  |  | armA_[Pseudomonas aeruginosa] |
|  |  | ANT(3'')-IIa_[Acinetobacter baumannii ATCC 19606] |
|  |  | adeN_[Acinetobacter baumannii] |
|  |  | abeS_[Acinetobacter baumannii AB307-0294] |
|  |  | tet(B)_[Gram-negative bacterium TC71] |
| S3 | BALF | adeF_[Acinetobacter baumannii AYE] |
|  |  | adeK_[Acinetobacter baumannii] |
|  |  | abeM_[Acinetobacter baumannii] |
|  |  | adeI_[Acinetobacter baumannii AB0057] |
|  |  | adeH_[Acinetobacter baumannii AYE] |
|  |  | sul2_[Vibrio cholerae] |
|  |  | adeC_[Acinetobacter baumannii] |
|  |  | adeG_[Acinetobacter baumannii AYE] |
|  |  | adeA_[Acinetobacter baumannii] |
|  |  | sul1_[Vibrio fluvialis] |
|  |  | adeL_[Acinetobacter baumannii] |
|  |  | adeS_[Acinetobacter baumannii] |
|  |  | ANT(3'')-IIa_[Acinetobacter baumannii ATCC 19606] |
|  |  | adeN_[Acinetobacter baumannii] |
|  |  | AAC(3)-Ia_[Pseudomonas aeruginosa] |
|  |  | abeS_[Acinetobacter baumannii AB307-0294] |
| S69 | Sputum | abeM_[Acinetobacter baumannii] |
|  |  | adeI_[Acinetobacter baumannii AB0057] |
|  |  | adeG_[Acinetobacter baumannii AYE] |
|  |  | sul2_[Vibrio cholerae] |
|  |  | adeA_[Acinetobacter baumannii] |
|  |  | armA_[Pseudomonas aeruginosa] |
|  |  | adeL_[Acinetobacter baumannii] |
|  |  | APH(3'')-Ib_[Pseudomonas aeruginosa] |
|  |  | ANT(3'')-IIa_[Acinetobacter baumannii ATCC 19606] |
|  |  | adeN_[Acinetobacter baumannii] |
| S32 | BALF | adeF_[Acinetobacter baumannii AYE] |
|  |  | abeM_[Acinetobacter baumannii] |
|  |  | adeC_[Acinetobacter baumannii] |
|  |  | adeH_[Acinetobacter baumannii AYE] |
|  |  | adeK_[Acinetobacter baumannii] |
|  |  | msrE_[Escherichia coli] |
|  |  | adeI_[Acinetobacter baumannii AB0057] |
|  |  | adeA_[Acinetobacter baumannii] |
|  |  | adeG_[Acinetobacter baumannii AYE] |
|  |  | adeL_[Acinetobacter baumannii] |
|  |  | sul2_[Vibrio cholerae] |
|  |  | adeS_[Acinetobacter baumannii] |
|  |  | armA_[Pseudomonas aeruginosa] |
|  |  | APH(3'')-Ib_[Pseudomonas aeruginosa] |
|  |  | APH(6)-Id_[Pseudomonas aeruginosa] |
|  |  | mphD_[Pseudomonas aeruginosa] |
|  |  | adeN_[Acinetobacter baumannii] |
|  |  | ANT(3'')-IIa_[Acinetobacter baumannii ATCC 19606] |
|  |  | abeS_[Acinetobacter baumannii AB307-0294] |
|  |  | tet(B)_[Gram-negative bacterium TC71] |
| S39 | BALF | adeF_[Acinetobacter baumannii AYE] |
|  |  | adeH_[Acinetobacter baumannii AYE] |
|  |  | adeC_[Acinetobacter baumannii] |
|  |  | msrE_[Escherichia coli] |
|  |  | adeK_[Acinetobacter baumannii] |
|  |  | sul2_[Vibrio cholerae] |
|  |  | abeM_[Acinetobacter baumannii] |
|  |  | adeI_[Acinetobacter baumannii AB0057] |
|  |  | APH(3'')-Ib_[Pseudomonas aeruginosa] |
|  |  | APH(6)-Id_[Pseudomonas aeruginosa] |
|  |  | adeA_[Acinetobacter baumannii] |
|  |  | adeG_[Acinetobacter baumannii AYE] |
|  |  | adeL_[Acinetobacter baumannii] |
|  |  | sul1_[Vibrio fluvialis] |
|  |  | armA_[Pseudomonas aeruginosa] |
|  |  | mphD_[Pseudomonas aeruginosa] |
|  |  | adeS_[Acinetobacter baumannii] |
|  |  | adeN_[Acinetobacter baumannii] |
|  |  | ANT(3'')-IIa_[Acinetobacter baumannii ATCC 19606] |
|  |  | abeS_[Acinetobacter baumannii AB307-0294] |
|  |  | tet(B)_[Gram-negative bacterium TC71] |
| S40 | BALF | adeH_[Acinetobacter baumannii AYE] |
|  |  | adeL_[Acinetobacter baumannii] |
|  |  | sul2_[Vibrio cholerae] |
|  |  | APH(3'')-Ib_[Pseudomonas aeruginosa] |
| S20 | BALF | adeF_[Acinetobacter baumannii AYE] |
|  |  | adeK_[Acinetobacter baumannii] |
|  |  | msrE_[Escherichia coli] |
|  |  | abeM_[Acinetobacter baumannii] |
|  |  | adeH_[Acinetobacter baumannii AYE] |
|  |  | adeI_[Acinetobacter baumannii AB0057] |
|  |  | adeC_[Acinetobacter baumannii] |
|  |  | APH(6)-Id_[Pseudomonas aeruginosa] |
|  |  | mphD_[Pseudomonas aeruginosa] |
|  |  | APH(3'')-Ib_[Pseudomonas aeruginosa] |
|  |  | adeA_[Acinetobacter baumannii] |
|  |  | adeG_[Acinetobacter baumannii AYE] |
|  |  | adeL_[Acinetobacter baumannii] |
|  |  | armA_[Pseudomonas aeruginosa] |
|  |  | ANT(3'')-IIa_[Acinetobacter baumannii ATCC 19606] |
|  |  | adeN_[Acinetobacter baumannii] |
|  |  | abeS_[Acinetobacter baumannii AB307-0294] |
| S26 | BALF | adeJ_[Acinetobacter baumannii] |
|  |  | adeF_[Acinetobacter baumannii AYE] |
|  |  | adeB_[Acinetobacter baumannii] |
|  |  | tet(B)_[Gram-negative bacterium TC71] |
|  |  | sul2_[Vibrio cholerae] |
|  |  | adeC_[Acinetobacter baumannii] |
|  |  | adeK_[Acinetobacter baumannii] |
|  |  | adeH_[Acinetobacter baumannii AYE] |
|  |  | abeM_[Acinetobacter baumannii] |
|  |  | adeI_[Acinetobacter baumannii AB0057] |
|  |  | adeG_[Acinetobacter baumannii AYE] |
|  |  | Acinetobacter baumannii AbaF_[Acinetobacter baumannii ATCC 17978] |
|  |  | msrE_[Acinetobacter baumannii] |
|  |  | Acinetobacter baumannii AmvA_[Acinetobacter baumannii] |
|  |  | APH(3'')-Ib_[Pseudomonas aeruginosa] |
|  |  | APH(6)-Id_[Pseudomonas aeruginosa] |
|  |  | armA_[Pseudomonas aeruginosa] |
|  |  | mphE_[uncultured bacterium] |
|  |  | adeS_[Acinetobacter baumannii] |
|  |  | Acinetobacter baumannii AbaQ_[Acinetobacter baumannii AB0057] |
|  |  | adeL_[Acinetobacter baumannii] |
|  |  | adeA_[Acinetobacter baumannii] |
|  |  | adeR_[Acinetobacter baumannii] |
|  |  | adeN_[Acinetobacter baumannii] |
|  |  | abeS_[Acinetobacter baumannii AB307-0294] |
| S130 | Bile | adeJ_[Acinetobacter baumannii] |
|  |  | adeF_[Acinetobacter baumannii AYE] |
|  |  | adeB_[Acinetobacter baumannii] |
|  |  | abeM_[Acinetobacter baumannii] |
|  |  | adeK_[Acinetobacter baumannii] |
|  |  | tet(B)_[Gram-negative bacterium TC71] |
|  |  | adeH_[Acinetobacter baumannii AYE] |
|  |  | adeI_[Acinetobacter baumannii AB0057] |
|  |  | APH(6)-Id_[Pseudomonas aeruginosa] |
|  |  | APH(3'')-Ib_[Pseudomonas aeruginosa] |
|  |  | msrE_[Acinetobacter baumannii] |
|  |  | Acinetobacter baumannii AbaF_[Acinetobacter baumannii ATCC 17978] |
|  |  | sul2_[Vibrio cholerae] |
|  |  | adeG_[Acinetobacter baumannii AYE] |
|  |  | Acinetobacter baumannii AmvA_[Acinetobacter baumannii] |
|  |  | adeA_[Acinetobacter baumannii] |
|  |  | adeC_[Acinetobacter baumannii] |
|  |  | adeL_[Acinetobacter baumannii] |
|  |  | Acinetobacter baumannii AbaQ_[Acinetobacter baumannii AB0057] |
|  |  | mphE_[uncultured bacterium] |
|  |  | adeS_[Acinetobacter baumannii] |
|  |  | armA_[Pseudomonas aeruginosa] |
|  |  | adeR_[Acinetobacter baumannii] |
|  |  | adeN_[Acinetobacter baumannii] |
|  |  | abeS_[Acinetobacter baumannii AB307-0294] |
| S44 | BALF | NULL |
| S4 | BALF | NULL |
| S65 | BALF | NULL |

***Abbreviations***: *BALF*: Broncho alveolar lavage fluid; *ARGs*: Resistance genes; *NULL*: No data.
